# Supplementary material for: Tracking the cellular uptake and phototoxicity of Ru(ii)-polypyridyl-1,8-naphthalimide Tröger's base conjugates
Source: Royal Society of Chemistry journal article supplement (doi:10.1039/d3cb00206c), 2024-01-01
Supplement: d3cb00206c1.pdf [file d3cb00206c1.pdf]

## Supplementary Information

### Tracking the Cellular Uptake and Phototoxicity of Ru(II)-polypyridyl-1,8-naphthalimide Tröger's base conjugates

Sandra A. Bright,<sup>1,2#</sup> MariaLuisa Erby,<sup>1#</sup> Fergus E. Poynton,<sup>2</sup> Daniel Monteyne,<sup>3</sup> David Pérez-Morga,<sup>3,4</sup> Thorfinnur Gunnlaugsson,<sup>\*2,5</sup> D. Clive Williams,<sup>\*1</sup> and Robert B. P. Elmes<sup>\*5,6,7</sup>

<sup>1</sup>School of Biochemistry and Immunology, Biomedical Sciences Institute, Trinity College, Dublin 2, Ireland. E-mail: [clive.williams@tcd.ie](mailto:clive.williams@tcd.ie); Tel: +353 1 8962596.

<sup>2</sup>School of Chemistry, Centre for Synthesis and Chemical Biology, Biomedical Sciences Institute, Trinity College Dublin, Dublin 2, Ireland. E-mail: [gunnlaut@tcd.ie](mailto:gunnlaut@tcd.ie); Tel: +353 1 8963459.

<sup>3</sup>Laboratoire de Parasitologie Moléculaire, IBMM-DBM Université Libre de Bruxelles, Gosselies, Belgium

<sup>4</sup>Center for Microscopy and Molecular Imaging CMMI Université Libre de Bruxelles, Gosselies, Belgium

<sup>5</sup> Synthesis and Solid State Pharmaceutical Centre (SSPC), University of Limerick, Ireland

<sup>6</sup> Department of Chemistry, Maynooth University, National University of Ireland, Maynooth, Co. Kildare, Ireland. E-mail: [robert.elmes@mu.ie](mailto:robert.elmes@mu.ie); Tel: +353 1708 4615

<sup>7</sup> Kathleen Lonsdale Institute for Human Health Research, Maynooth University, Maynooth, Co. Kildare, Ireland.

#Authors contributed equally

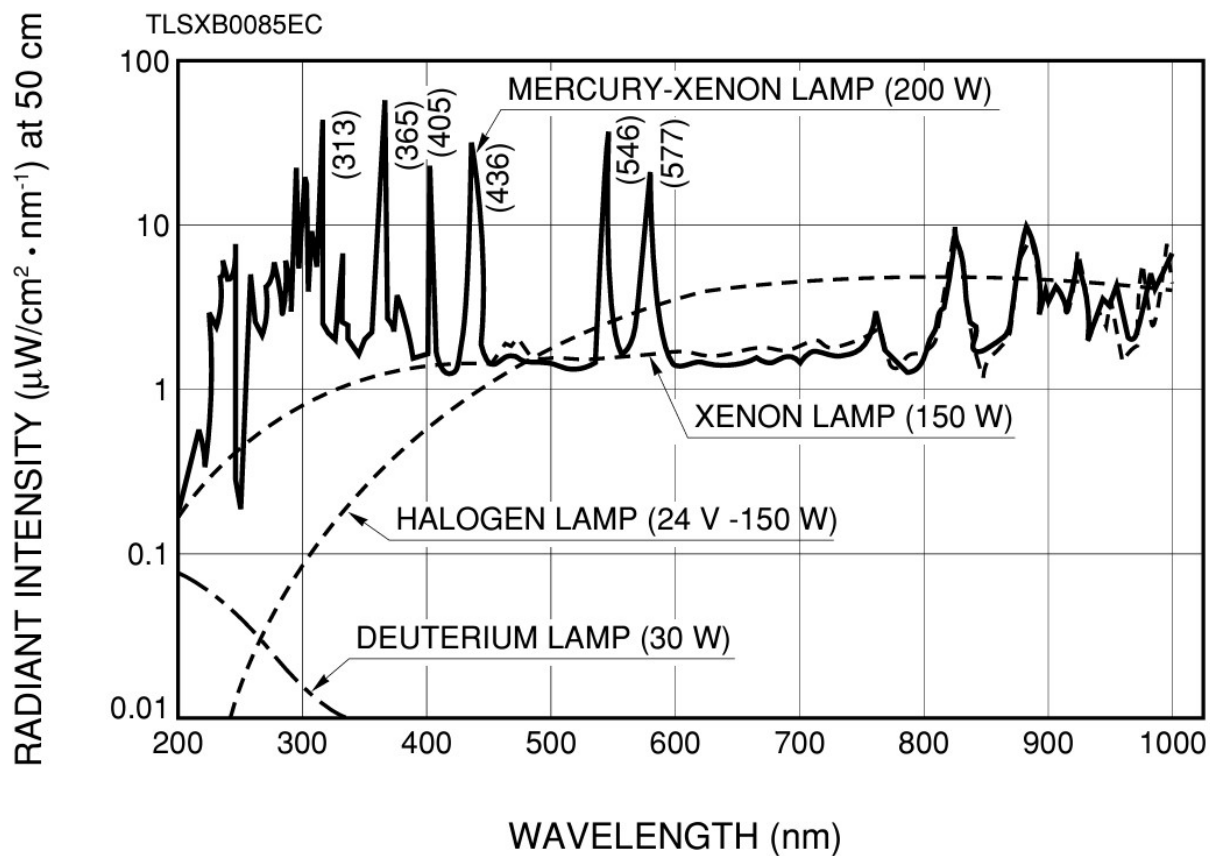

**Figure S1:** The radiation spectrum of the Hamamatsu L2570 200 W HgXe arc lamp with comparison to deuterium, halogen and xenon lamps. Reproduced from manufacturer's specification.
